# Supplementary material for: On synergy between ultrahigh throughput screening and machine learning in biocatalyst engineering
Source: Royal Society of Chemistry journal article supplement (doi:10.1039/d4fd00065j), 2024-01-01
Supplement: d4fd00065j1.pdf [file d4fd00065j1.pdf]

There is no supplementary information for this article.
